# Supplementary material for: Formalin-evoked pain triggers sex-specific behavior and spinal immune response
Source: PubMed Central journal article supplement (PMC10261048; doi:10.1038/s41598-023-36245-7), 2023-06-12
Supplement: 41598_2023_36245_MOESM1_ESM.pdf [file 41598_2023_36245_MOESM1_ESM.pdf]

## **Supplemental Information**

### **Content:**

**Supplemental Figures S1-5 and Supplemental Figures Legends**

**Supplemental Table S1**

**Supplemental Table S2**

Figure S1

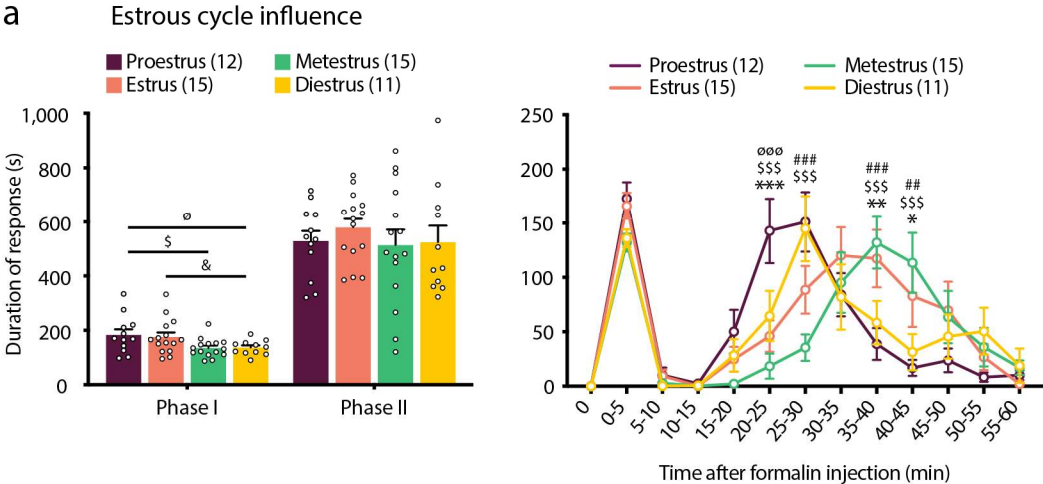

Figure S2

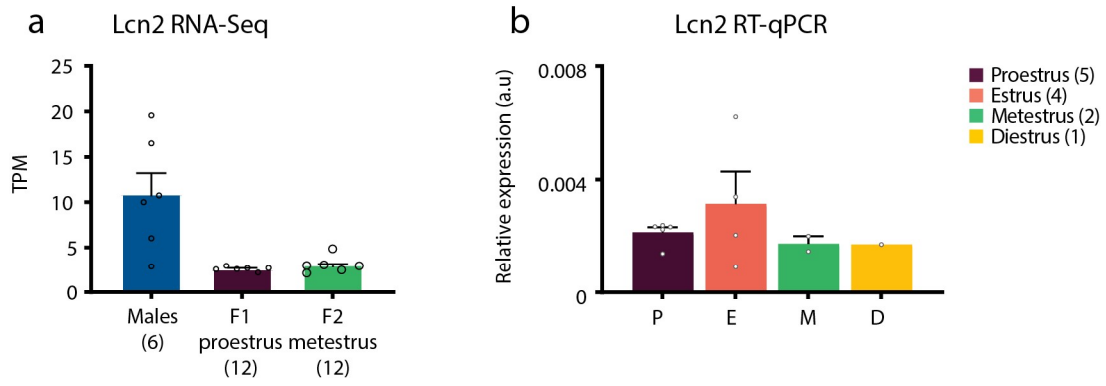

Figure S3

a Dorsal horn of the spinal cord

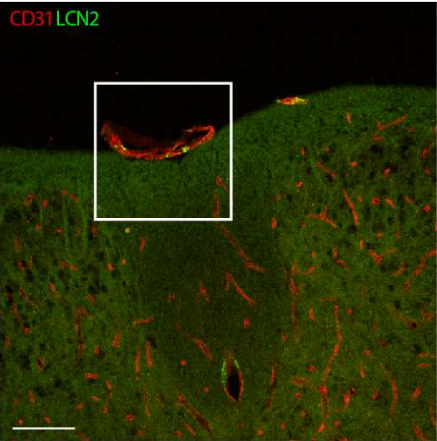

b Dorsal median sulcus

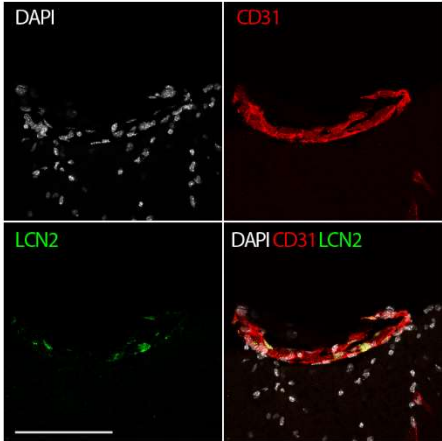

Figure S4

a Gating strategy

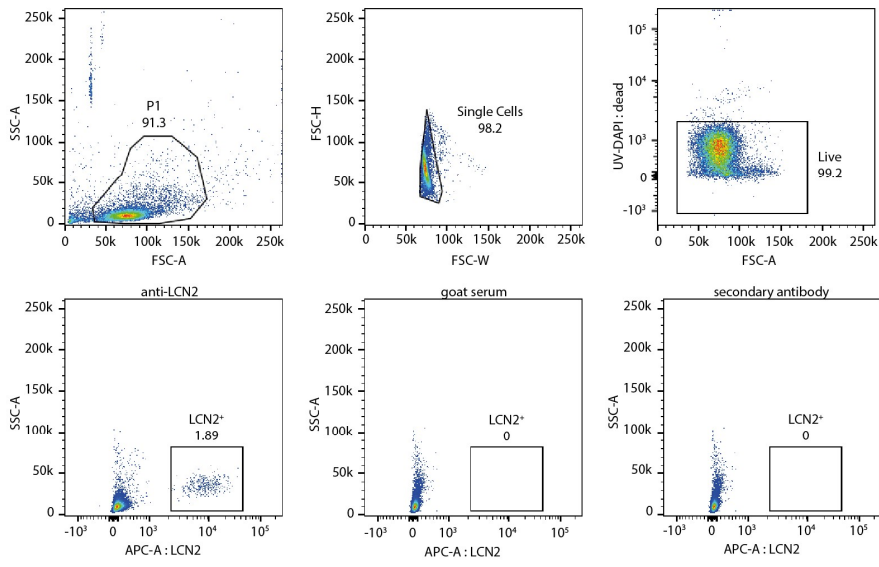

b Backgating strategy

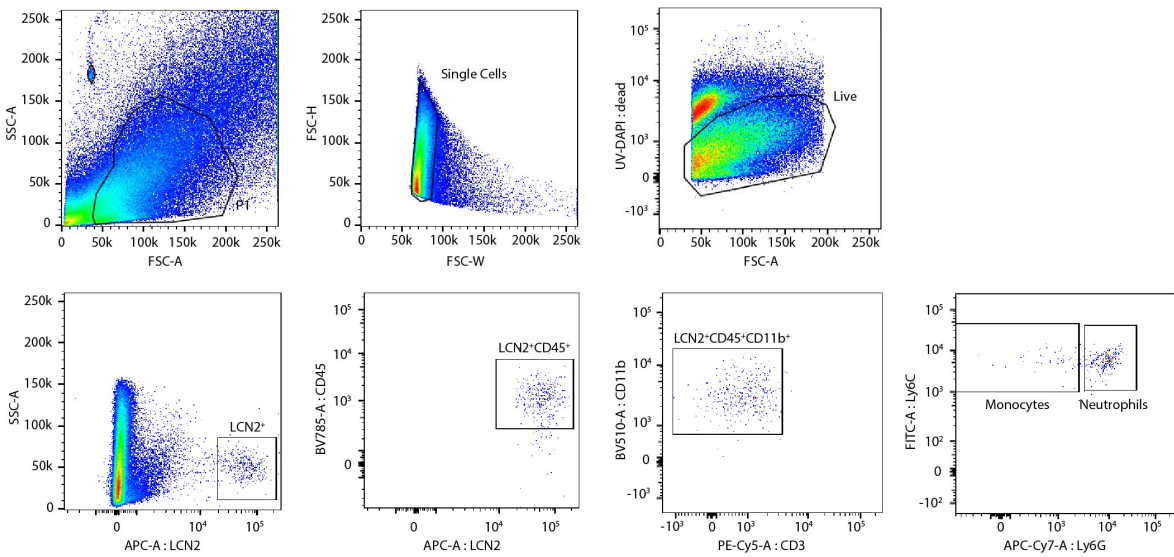

## Supplemental Figure Legends

### Figure S1: Estrus cycle influence on female formalin-evoked pain behavior

Cumulative duration (left) and time-course (right) of formalin-evoked nocifensive behavior (in seconds, s) in females in proestrus (n=12), estrus (n=15), metestrus (n=15) and diestrus (n=11). Data are presented as mean  $\pm$  SEM. (proestrus-estrus: \* p < 0.05; \*\* p < 0.01; \*\*\* p < 0.001) (proestrus-metestrus: \$ p < 0.05; \$\$\$ p < 0.001) (proestrus-diestrus: ø p < 0.05; øøø p < 0.001) (estrus-diestrus: & p < 0.05) (metestrus-diestrus: ## p < 0.01; ### p < 0.001)

### Figure S2: *Lcn2* expression in the dorsal horn of the spinal cord (DHSC) in formalin-injected males and in females across the estrus cycle

(a) *Lcn2* expression levels in Transcripts per Million (TPM) obtained by RNA-Seq in the ipsilateral DHSC of males (n=6), F1/proestrus females (n=6) and F2/metestrus females (n=6), harvested 2H post-formalin injection in the hind-paw. (b) *Lcn2* expression levels normalized to  $\beta$ -actin, determined by RT-qPCR in the ipsilateral DHSC of females in P: proestrus (n= 5), E: estrus (n=4), M: metestrus (n=2) and D: diestrus (n=1), at 2H post formalin injection into the hind-paw.

### Figure S3: LCN2 immunostaining on transversal spinal cord cryosections

(a-b) Immunostaining on SC cryosections from formalin-injected male harvested 2H post-formalin, with anti-CD31 (red) and anti-LCN2 (green) antibodies. (a) Shows the dorsal horn with a pia vessel attached. (b). Zoom on the corresponding inset.

### Figure S4: Validation of intracellular LCN2 staining in flow cytometry and determination of the identity of LCN2<sup>+</sup> cells in the pia mater of the SC

(a) FACS analysis of brain cell suspension used to validate the accuracy of intracellular LCN2 staining. Upper panels show the gating strategy. Cells were gated according to size and structure; doublets and dead cells were eliminated. Lower panel shows the total fluorescence in the APC channel using anti-LCN2 purified antibodies (left), goat serum (middle) or none (right), followed by donkey-anti goat Alexa 647 coupled secondary antibody.

(b) Back-gating strategy used to determine the identity of LCN2<sup>+</sup> cells in the pia mater. Upper panels: cells were gated according to size and structure and doublets and dead cells were eliminated. Lower panels: total LCN2<sup>+</sup> cells were gated (left) and the population of LCN2<sup>+</sup>CD45<sup>+</sup> cells was further gated (middle). Within this gate, the population of LCN2<sup>+</sup>CD45<sup>+</sup>CD11b<sup>+</sup> was gated and was further subdivided into Ly6G<sup>+</sup>Ly6C<sup>+</sup> cells (neutrophils) and Ly6G<sup>-</sup>Ly6C<sup>+</sup> cells (monocytes). The sample represented here is the pia mater from formalin-injected males.

**Figure S5: Neutrophil recruitment to the pia mater of spinal leptomeninges in naïve and formalin-injected males and females**

Shows the percentages of CD11b<sup>+</sup>Ly6G<sup>+</sup> neutrophils gated on Live/CD45.2<sup>+</sup>CD3<sup>-</sup> cells in naive and formalin injected males (left) and free cycling females (right). The percentages of LCN2<sup>+</sup> neutrophils are also represented. Data are expressed as mean ± SEM. (n=3 to 6 per condition).

**Table S1: List of female versus male DEG**

| Gene ID            | Gene name     | log2(FC) | FDR       |
|--------------------|---------------|----------|-----------|
| ENSMUSG00000086503 | Xist          | 8.1853   | 1.87E-169 |
| ENSMUSG00000098743 | Gm27927       | 6.6401   | 6.29E-11  |
| ENSMUSG00000085715 | Tsix          | 6.5036   | 7.22E-57  |
| ENSMUSG00000098078 | Gm26992       | 3.2501   | 1.91E-02  |
| ENSMUSG00000111752 | Gm38575       | 2.2201   | 2.47E-02  |
| ENSMUSG00000102448 | Gm37101       | 1.4904   | 2.96E-02  |
| ENSMUSG00000106292 | Gm43174       | 1.3483   | 4.01E-02  |
| ENSMUSG0000004651  | Tyr           | 1.3015   | 2.44E-02  |
| ENSMUSG00000063286 | Gm8995        | 0.9520   | 4.16E-04  |
| ENSMUSG00000032561 | Acpp          | 0.8634   | 6.31E-03  |
| ENSMUSG00000090272 | Mndal         | 0.8467   | 2.35E-02  |
| ENSMUSG00000028037 | Ifi44         | 0.8309   | 1.48E-02  |
| ENSMUSG00000033427 | Upb1          | 0.8114   | 1.87E-02  |
| ENSMUSG00000037369 | Kdm6a         | 0.7056   | 1.35E-10  |
| ENSMUSG00000041596 | Nlrp5-ps      | 0.6848   | 4.47E-02  |
| ENSMUSG00000079297 | Gm2223        | 0.6649   | 2.14E-55  |
| ENSMUSG00000066842 | Hmcn1         | 0.6586   | 3.81E-02  |
| ENSMUSG00000029298 | Gbp9          | 0.6249   | 1.93E-02  |
| ENSMUSG00000029563 | Foxp2         | 0.6198   | 1.91E-02  |
| ENSMUSG00000028004 | Npy2r         | 0.6131   | 1.22E-03  |
| ENSMUSG00000035150 | Eif2s3x       | 0.5979   | 6.90E-12  |
| ENSMUSG00000000787 | Ddx3x         | 0.5261   | 1.78E-11  |
| ENSMUSG00000038859 | Baiap2l1      | 0.4908   | 2.22E-02  |
| ENSMUSG00000025332 | Kdm5c         | 0.4857   | 3.81E-02  |
| ENSMUSG00000046500 | Fam19a4       | 0.4832   | 4.56E-02  |
| ENSMUSG00000090570 | Gm17041       | 0.4514   | 2.79E-02  |
| ENSMUSG00000045657 | Pcdhb10       | 0.4416   | 2.27E-03  |
| ENSMUSG00000024079 | Eif2ak2       | 0.4162   | 1.96E-02  |
| ENSMUSG00000037613 | Tnfrsf23      | 0.4111   | 2.79E-02  |
| ENSMUSG00000087174 | 5530601H04Rik | 0.4021   | 9.89E-05  |
| ENSMUSG00000082286 | Pisd-ps1      | 0.3990   | 6.41E-03  |
| ENSMUSG00000051486 | Pcdhb11       | 0.3969   | 1.93E-02  |
| ENSMUSG00000032578 | Cish          | 0.3930   | 3.39E-03  |
| ENSMUSG00000045498 | Pcdhb3        | 0.3913   | 5.38E-03  |
| ENSMUSG00000023795 | Pisd-ps2      | 0.3900   | 1.60E-05  |
| ENSMUSG00000031226 | Pbdc1         | 0.3779   | 9.33E-09  |
| ENSMUSG00000029086 | Prom1         | 0.3751   | 9.82E-04  |
| ENSMUSG00000027765 | P2ry1         | 0.3494   | 2.74E-03  |
| ENSMUSG00000092223 | Gm19807       | 0.3472   | 2.22E-02  |
| ENSMUSG00000042686 | Jph1          | 0.3471   | 7.33E-03  |
| ENSMUSG00000044338 | Aplnr         | 0.3426   | 4.59E-02  |
| ENSMUSG00000030235 | Slco1c1       | 0.3215   | 4.03E-04  |
| ENSMUSG00000034738 | Nostrin       | 0.3068   | 2.35E-02  |
| ENSMUSG00000097571 | Jpx           | 0.2993   | 3.51E-02  |
| ENSMUSG00000031480 | Thsd1         | 0.2658   | 1.67E-02  |
| ENSMUSG00000025586 | Cpeb1         | 0.2627   | 2.57E-02  |
| ENSMUSG00000031673 | Cdh11         | 0.2572   | 6.31E-03  |
| ENSMUSG00000029802 | Abcg2         | 0.2447   | 2.42E-02  |
| ENSMUSG00000019647 | Sema6a        | 0.2253   | 2.51E-02  |
| ENSMUSG00000087528 | 9830144P21Rik | 0.2246   | 1.51E-02  |
| ENSMUSG00000033308 | Dpyd          | 0.2231   | 6.62E-03  |
| ENSMUSG00000049493 | Pls1          | 0.2106   | 2.22E-02  |
| ENSMUSG00000022321 | Cdh10         | 0.2071   | 5.73E-03  |
| ENSMUSG00000037709 | Fam13a        | 0.2069   | 4.47E-02  |
| ENSMUSG00000027397 | Slc20a1       | 0.1860   | 1.48E-02  |
| ENSMUSG00000018733 | Pex12         | 0.1784   | 4.75E-02  |
| ENSMUSG00000037134 | Prmt9         | 0.1748   | 2.85E-02  |
| ENSMUSG00000024621 | Csf1r         | -0.1905  | 6.02E-03  |
| ENSMUSG00000044197 | Gpr146        | -0.2027  | 9.82E-04  |
| ENSMUSG00000061833 | Gm6311        | -0.2058  | 4.40E-02  |
| ENSMUSG00000031828 | Klhl36        | -0.2291  | 4.78E-02  |
| ENSMUSG00000026090 | 2010300C02Rik | -0.2318  | 4.75E-02  |
| ENSMUSG00000051504 | Siglech       | -0.2514  | 3.14E-02  |
| ENSMUSG00000027997 | Casp6         | -0.2687  | 1.19E-02  |
| ENSMUSG00000024292 | Cyp4f14       | -0.2704  | 1.96E-02  |
| ENSMUSG00000058715 | Fcer1g        | -0.2779  | 3.95E-02  |
| ENSMUSG00000021643 | Serf1         | -0.2841  | 3.69E-02  |
| ENSMUSG00000097680 | Gm26642       | -0.2894  | 3.39E-03  |
| ENSMUSG00000117924 |               | -0.2903  | 4.20E-02  |
| ENSMUSG00000018008 | Cyth4         | -0.3091  | 1.92E-02  |
| ENSMUSG00000044551 | 9930012K11Rik | -0.3095  | 3.81E-02  |
| ENSMUSG00000024695 | Zfp91         | -0.3106  | 3.03E-02  |
| ENSMUSG00000039410 | Prdm16        | -0.3158  | 4.23E-02  |
| ENSMUSG00000020374 | Rasgef1c      | -0.3198  | 4.01E-03  |
| ENSMUSG00000003283 | Hck           | -0.3263  | 3.81E-02  |
| ENSMUSG00000052192 | Gm5963        | -0.3299  | 2.95E-02  |
| ENSMUSG00000036905 | C1qb          | -0.3309  | 1.91E-02  |
| ENSMUSG00000034796 | Cpne7         | -0.3508  | 2.22E-02  |
| ENSMUSG00000005951 | Shpk          | -0.3569  | 7.98E-03  |

| Gene ID            | Gene name     | log2(FC) | FDR       |
|--------------------|---------------|----------|-----------|
| ENSMUSG00000027400 | Pdyn          | -0.3600  | 5.73E-03  |
| ENSMUSG00000050248 | Evc2          | -0.3610  | 5.38E-03  |
| ENSMUSG00000073424 | Cyp4f15       | -0.3648  | 3.14E-02  |
| ENSMUSG00000086938 | 4930481A15Rik | -0.3715  | 5.73E-03  |
| ENSMUSG00000031805 | Jak3          | -0.3740  | 3.03E-02  |
| ENSMUSG00000079235 | Ccdc13        | -0.3829  | 6.91E-03  |
| ENSMUSG00000001741 | Il16          | -0.4013  | 6.91E-03  |
| ENSMUSG00000089544 | Gm25837       | -0.4064  | 4.78E-02  |
| ENSMUSG00000023153 | Tmem52        | -0.4067  | 3.81E-02  |
| ENSMUSG00000029597 | Sds           | -0.4106  | 1.38E-02  |
| ENSMUSG00000026278 | Bok           | -0.4201  | 2.06E-03  |
| ENSMUSG00000038732 | Mboat1        | -0.4316  | 2.75E-02  |
| ENSMUSG00000023067 | Cdkn1a        | -0.4439  | 3.95E-02  |
| ENSMUSG00000026480 | Ncf2          | -0.4583  | 2.42E-02  |
| ENSMUSG00000034842 | Art3          | -0.4790  | 2.28E-03  |
| ENSMUSG00000005373 | Mxipl         | -0.4907  | 3.81E-02  |
| ENSMUSG00000001918 | Slc1a5        | -0.5009  | 3.81E-02  |
| ENSMUSG00000051212 | Gpr183        | -0.5009  | 1.19E-02  |
| ENSMUSG00000022715 | Tmem114       | -0.5046  | 3.11E-02  |
| ENSMUSG00000082433 | Gm9025        | -0.5113  | 2.30E-04  |
| ENSMUSG00000114429 | AC113060.1    | -0.5113  | 2.30E-04  |
| ENSMUSG00000027315 | Spint1        | -0.5421  | 5.38E-03  |
| ENSMUSG00000030711 | Sult1a1       | -0.5489  | 6.32E-04  |
| ENSMUSG00000040428 | Plekha4       | -0.5517  | 2.42E-02  |
| ENSMUSG00000071713 | Csf2rb        | -0.5602  | 2.71E-02  |
| ENSMUSG00000048794 | Cfap100       | -0.5742  | 3.90E-03  |
| ENSMUSG00000087371 | Gm15541       | -0.5835  | 1.19E-02  |
| ENSMUSG00000116772 |               | -0.5882  | 3.81E-02  |
| ENSMUSG00000053198 | Prx           | -0.5964  | 1.19E-02  |
| ENSMUSG00000092085 | Gm17224       | -0.6013  | 2.87E-02  |
| ENSMUSG00000007122 | Casq1         | -0.6037  | 4.02E-05  |
| ENSMUSG00000021676 | Iqgap2        | -0.6047  | 4.05E-02  |
| ENSMUSG00000045573 | Penk          | -0.6260  | 1.83E-08  |
| ENSMUSG00000032355 | Mlip          | -0.6338  | 1.67E-02  |
| ENSMUSG00000086165 | Gm15690       | -0.6355  | 4.93E-02  |
| ENSMUSG00000002104 | Rapsn         | -0.6411  | 1.68E-03  |
| ENSMUSG00000085996 | A830012C17Rik | -0.6476  | 2.77E-12  |
| ENSMUSG00000043924 | Ncmap         | -0.6633  | 2.19E-05  |
| ENSMUSG00000066058 | Cldn19        | -0.6986  | 1.82E-02  |
| ENSMUSG00000024227 | Pdzph1        | -0.7079  | 7.89E-05  |
| ENSMUSG00000087589 | D430040D24Rik | -0.7103  | 2.77E-03  |
| ENSMUSG00000067219 | Nipal1        | -0.7344  | 3.07E-03  |
| ENSMUSG00000059900 | Tmem40        | -0.7579  | 9.31E-03  |
| ENSMUSG00000066457 | Actn3         | -0.7755  | 3.81E-02  |
| ENSMUSG00000016942 | Tmprss6       | -0.7824  | 8.40E-03  |
| ENSMUSG00000046337 | Fam178b       | -0.7841  | 2.72E-04  |
| ENSMUSG00000028475 | Spaar         | -0.7990  | 6.74E-04  |
| ENSMUSG00000046922 | Gpr6          | -0.7994  | 3.79E-04  |
| ENSMUSG00000012428 | Steap4        | -0.8071  | 1.86E-02  |
| ENSMUSG00000105518 | Gm42674       | -0.8426  | 3.11E-02  |
| ENSMUSG00000001020 | S100a4        | -0.8532  | 3.51E-02  |
| ENSMUSG00000079415 | Cntf          | -0.8533  | 4.08E-05  |
| ENSMUSG00000038086 | Hspb2         | -0.8741  | 2.19E-05  |
| ENSMUSG00000071714 | Csf2rb2       | -0.8747  | 3.35E-02  |
| ENSMUSG00000002289 | Angptl4       | -0.8857  | 1.83E-07  |
| ENSMUSG00000104379 | Gm37509       | -0.9025  | 1.14E-05  |
| ENSMUSG00000024517 | Grp           | -0.9127  | 4.09E-06  |
| ENSMUSG00000032719 | Sbspon        | -0.9475  | 3.08E-07  |
| ENSMUSG00000038541 | Srd5a2        | -0.9573  | 2.23E-02  |
| ENSMUSG00000005220 | Corin         | -0.9781  | 1.81E-02  |
| ENSMUSG00000073535 | Gm5532        | -1.0461  | 1.70E-02  |
| ENSMUSG00000118365 |               | -1.1792  | 4.01E-03  |
| ENSMUSG00000102717 | Gm37759       | -1.2265  | 4.20E-02  |
| ENSMUSG00000019278 | Dpep1         | -1.2952  | 6.20E-06  |
| ENSMUSG00000009350 | Mpo           | -1.3646  | 2.30E-04  |
| ENSMUSG00000022651 | Retnlg        | -1.3934  | 5.73E-03  |
| ENSMUSG00000025480 | Syce1         | -1.5687  | 4.33E-04  |
| ENSMUSG00000078365 | Mos           | -1.7320  | 1.44E-02  |
| ENSMUSG00000106729 | Gm43165       | -1.8775  | 4.11E-03  |
| ENSMUSG00000070368 | Prok1         | -1.9052  | 1.29E-03  |
| ENSMUSG00000026822 | Lcn2          | -1.9636  | 4.28E-08  |
| ENSMUSG00000064057 | Scgb3a1       | -2.1625  | 5.38E-03  |
| ENSMUSG00000094613 | A63007617Rik  | -2.1876  | 1.49E-04  |
| ENSMUSG00000101059 | Gm4017        | -2.2965  | 1.72E-06  |
| ENSMUSG00000050359 | Sprr1a        | -3.1135  | 2.10E-02  |
| ENSMUSG00000056673 | Kdm5d         | -10.9214 | 1.34E-126 |
| ENSMUSG00000069049 | Eif2s3y       | -11.5334 | 2.22E-94  |
| ENSMUSG00000068457 | Uty           | -11.5861 | 7.61E-84  |
| ENSMUSG00000069045 | Ddx3y         | -11.6740 | 9.46E-79  |



**Table S2: IPA analysis of male-female DEG/Regulator effect**

| From Molecule(s) | Relationship Type            | To Molecule(s)               |
|------------------|------------------------------|------------------------------|
| CSF1R            | causation                    | Recruitment of leukocytes    |
| CSF1R            | causation                    | Recruitment of myeloid cells |
| CSF2RB           | causation                    | Recruitment of leukocytes    |
| CSF2RB           | causation                    | Recruitment of myeloid cells |
| HCK              | causation                    | Recruitment of leukocytes    |
| HCK              | causation                    | Recruitment of myeloid cells |
| IL16             | causation                    | Recruitment of leukocytes    |
| IL17A            | causation                    | Recruitment of leukocytes    |
| IL17A            | causation                    | Recruitment of myeloid cells |
| IL17A            | expression                   | IL16                         |
| IL17A            | expression                   | IL17A                        |
| IL17A            | expression                   | LCN2                         |
| IL17A            | expression                   | MPO                          |
| IL17A            | protein-protein interactions | IL17A                        |
| IL17A            | transcription                | LCN2                         |
| Immunoglobulin   | causation                    | Recruitment of leukocytes    |
| Immunoglobulin   | causation                    | Recruitment of myeloid cells |
| Immunoglobulin   | expression                   | CSF1R                        |
| Immunoglobulin   | expression                   | CSF2RB                       |
| Immunoglobulin   | expression                   | HCK                          |
| Immunoglobulin   | expression                   | IL17A                        |
| Immunoglobulin   | expression                   | Immunoglobulin               |
| Immunoglobulin   | expression                   | LCN2                         |
| Immunoglobulin   | expression                   | MPO                          |
| Immunoglobulin   | localization                 | IL17A                        |
| Immunoglobulin   | regulation of binding        | IL17A                        |
| Immunoglobulin   | regulation of binding        | Immunoglobulin               |
| Immunoglobulin   | transcription                | IL17A                        |
| LCN2             | causation                    | Recruitment of leukocytes    |
| LCN2             | causation                    | Recruitment of myeloid cells |
| MPO              | causation                    | Recruitment of leukocytes    |
| MPO              | causation                    | Recruitment of myeloid cells |

Interpretation of male and female DEG with IPA software, using the Regulator Effects algorithm. The Regulator Effects algorithm connects upstream regulators, dataset molecules and downstream functions or diseases affected in the dataset to generate a hypothesis that can explain how the activation or inhibition of an upstream regulator affects the downstream target molecule expression and the impact of the molecular expression on functions and diseases. The

algorithm goes through one or more iterations to merge upstream and downstream results from the Upstream Regulator. The networks are merged only if the overlap of targets has possible statistical significance (Fisher's Exact Test p-value of  $<0.05$ ). For each network, a Consistency Score is calculated that rewards for paths from regulator->target->disease or function that are consistent. Higher scoring hypotheses are those with more consistent causal paths represented by a high Consistency Score.
